# Supplementary material for: Genomic Landscape of Malignant Mesotheliomas
Source: Oxford University Press journal article supplement (doi:10.1158/1535-7163.mct-16-0229), 2016-08-09
Supplement: 15357163mct160229-sup-165045_1_supp_3546586_d8y1v6.docx [file 15357163mct160229-sup-165045_1_supp_3546586_d8y1v6.docx]

**Supplemental Table 1**. Baseline characteristics of mesothelioma and frequently associated genomic aberrations (N=42)

| Genomic aberrations | All mesothelioma  N=42, No. (%) | Pleural mesothelioma  N=23, No. (%) | Peritoneal mesothelioma  N=11, No. (%) | Pericardial mesothelioma  N=2, No. (%) | Subtype unknown  N=6, No. (%) |
| --- | --- | --- | --- | --- | --- |
| *BAP1* aberration * | 20 (47.6%) | 14 (60.9%) | 3 (27.3%) | 2 (100%) | 1 (16.7%) |
| *NF2* aberration # | 16 (38.1%) | 8 (34.8%) | 4 (36.4%) | 0 (0%) | 4 (66.7%) |
| *CDKN2A/B* loss | 15 (35.7%) | 12 (52.2%) | 1 (9.1%) | 0 (0%) | 2 (33.3%) |
| *TP53* mutation | 7 (16.7%) | 4 (17.4%) | 1 (9.1%) | 0 (0%) | 2 (33.3%) |
| *CDKN2A* mutation | 3 (7.1%) | 2 (8.7%) | 1 (9.1%) | 0 (0%) | 0 (0%) |
| *CTNNB1* mutation | 3 (7.1%) | 2 (8.7%) | 0 (0) | 1 (50%) | 0 (0%) |
| *DNMT3A* mutation | 3 (7.1%) | 2 (8.7%) | 1 (9.1%) | 0 (0%) | 0 (0%) |
| *EPHA3* amplification | 3 (7.1%) | 2 (8.7%) | 0 (0) | 0 (0%) | 1 (16.7%) |
| *BRCA2* mutation | 2 (4.8%) | 1 (4.3%) | 1 (9.1%) | 0 (0%) | 0 (0%) |
| *FBXW7* mutation | 2 (4.8%) | 1 (4.3%) | 0 (0) | 0 (0%) | 1 (16.7%) |
| *MCL1* amplification | 2 (4.8%) | 0 (0) | 1 (9.1%) | 1 (50%) | 0 (0%) |
| *MYC* amplification | 2 (4.8%) | 2 (8.7%) | 0 (0) | 0 (0%) | 0 (0%) |
| *PTCH1* mutation | 2 (4.8%) | 2 (8.7%) | 0 (0) | 0 (0%) | 0 (0%) |
| *RICTOR* amplification | 2 (4.8%) | 1 (4.3%) | 1 (9.1%) | 0 (0%) | 0 (0%) |
| *TSC2* aberration§ | 2 (4.8%) | 1 (4.3%) | 1 (9.1%) | 0 (0%) | 0 (0%) |
| *VHL* mutation | 2 (4.8%) | 2 (8.7%) | 0 (0) | 0 (0%) | 0 (0%) |
| *ABL1* mutation | 1 (2.4%) | 1 (4.3%) | 0 (0%) | 0 (0%) | 0 (0%) |
| *AKT2* amplification | 1 (2.4%) | 1 (4.3%) | 0 (0%) | 0 (0%) | 0 (0%) |
| *ARID1A* mutation | 1 (2.4%) | 1 (4.3%) | 0 (0%) | 0 (0%) | 0 (0%) |
| *ARID2* mutation | 1 (2.4%) | 1 (4.3%) | 0 (0%) | 0 (0%) | 0 (0%) |
| *ALK* fusion | 1 (2.4%) | 0 (0%) | 1 (9.1%) | 0 (0%) | 0 (0%) |
| *ATM* mutation | 1 (2.4%) | 0 (0%) | 0 (0%) | 0 (0%) | 1 (16.7%) |
| *BCL2* mutation | 1 (2.4%) | 0 (0%) | 1 (9.1%) | 0 (0%) | 0 (0%) |
| *CBL* mutation | 1 (2.4%) | 0 (0%) | 1 (9.1%) | 0 (0%) | 0 (0%) |
| *CCNE1* amplification | 1 (2.4%) | 1 (4.3%) | 0 (0%) | 0 (0%) | 0 (0%) |
| *CDH1* mutation | 1 (2.4%) | 0 (0%) | 1 (9.1%) | 0 (0%) | 0 (0%) |
| *EMSY* amplification | 1 (2.4%) | 1 (4.3%) | 0 (0%) | 0 (0%) | 0 (0%) |
| *FGFR3* amplification | 1 (2.4%) | 0 (0%) | 0 (0%) | 0 (0%) | 1 (16.7%) |
| *IGF1R* amplification | 1 (2.4%) | 0 (0%) | 1 (9.1%) | 0 (0%) | 0 (0%) |
| *KDR* mutation | 1 (2.4%) | 1 (4.3%) | 0 (0%) | 0 (0%) | 0 (0%) |
| *KRAS* mutation | 1 (2.4%) | 0 (0%) | 1 (9.1%) | 0 (0%) | 0 (0%) |
| *KMT2A* mutation | 1 (2.4%) | 0 (0%) | 1 (9.1%) | 0 (0%) | 0 (0%) |
| *MAP2K1* mutation | 1 (2.4%) | 1 (4.3%) | 0 (0%) | 0 (0%) | 0 (0%) |
| *MDM2* amplification | 1 (2.4%) | 1 (4.3%) | 0 (0%) | 0 (0%) | 0 (0%) |
| *NF1* mutation | 1 (2.4%) | 1 (4.3%) | 0 (0%) | 0 (0%) | 0 (0%) |
| *NRAS* mutation | 1 (2.4%) | 1 (4.3%) | 0 (0%) | 0 (0%) | 0 (0%) |
| *PIK3R2* mutation | 1 (2.4%) | 1 (4.3%) | 0 (0%) | 0 (0%) | 0 (0%) |
| *SOX2* amplification | 1 (2.4%) | 0 (0%) | 0 (0%) | 0 (0%) | 1 (16.7%) |
| *STK11* mutation | 1 (2.4%) | 1 (4.3%) | 0 (0%) | 0 (0%) | 0 (0%) |
| *SUFU* mutation | 1 (2.4%) | 0 (0%) | 0 (0%) | 0 (0%) | 1 (16.7%) |

* *BAP1* aberrations (N=20) include mutation (N=10), loss (N=5), multiple alterations (N=4) and rearrangement (N=1).

# *NF2* aberrations (N=16) include mutation (N=13), loss (N=2) and multiple alterations (N=1).

§ *TSC2* aberrations (N=2) include mutation (N=1) and loss (N=1).

**Supplemental Table 2**. Patient characteristics and molecular profiling of 42 mesothelioma and examples of cognate targeted therapies.

| Histology | Molecular aberration |
| --- | --- |
| Pleural mesothelioma | *BAP1* Y129*  *BAP1* R512fs*59  *TP53* A86fs*55  *PIK3R2* R218fs*121 |
| Pleural mesothelioma | *BAP1* rearrangement, intron 4  *CDKN2A/B* loss |
| Pleural mesothelioma | *CDKN2A* truncation  *CDKN2A/B* loss  *NF2* Y177fs*26 |
| Pleural mesothelioma | *MYC* amplification  *ABL1* A75T |
| Pleural mesothelioma | *CDKN2A/B* loss  *NF2* R516fs*23  *BAP1* T517fs*51  *DNMT3A* F909C |
| Pleural mesothelioma | *CDKN2A/B* loss  *RICTOR* amplification  *MYC* amplification  *EPHA3* amplification  *TP53* R282W |
| Pleural mesothelioma | *BAP1* R610fs*7  *BAP1* truncation, exon 3/4  *CDKN2A/B* loss |
| Pleural mesothelioma | *CDKN2A/B* loss  *MDM2* amplification  *EMSY* amplification  *BAP1* loss |
| Pleural mesothelioma | *BAP1* loss  *CTNNB1* Q280* |
| Pleural mesothelioma | *CDKN2A/B* loss  *NF2* loss  *KDR* N793S |
| Pleural mesothelioma | *AKT2* amplification  *CDKN2A/B* loss  *ARID2* deletion, exon 10-20  *CCNE1* amplification |
| Pleural mesothelioma | *BRCA2* K3326*  *BAP1* H169fs*18  *NF2* W184* |
| Pleural mesothelioma | *NF2* S287fs*9 |
| Pleural mesothelioma | *CDKN2A/B* loss  *VHL* P25L |
| Pleural mesothelioma | *PTCH1* deletion, exons 6-14  *NF2* E427*  *BAP1* S460* |
| Pleural mesothelioma | *EPHA3* amplification  *BAP1* S63C  *ARID1A* E602* |
| Pleural mesothelioma | *BAP1* splice site 784-2A>C  *DNMT3A* R882S  *CTNNB1* Y432* |
| Pleural mesothelioma | *NF2* V24fs*25  *TP53* S314F  *MAP2K1* E203K |
| Pleural mesothelioma | *TP53* K132N  *NRAS* Q61L  *NF1* R416*  *CDKN2A* P114L |
| Pleural mesothelioma | *BAP1* splice site 659+1G>T  *CDKN2A/B* loss  *STK11* T24fs*138 |
| Pleural mesothelioma | *BAP1* loss  *FBXW7* R479Q |
| Pleural mesothelioma | *CDKN2A/B* loss  *NF2* Y266*  *BAP1* splice site 362_375+10del  GTTTCAGCCCTGAGGTAGGCTGCA  *VHL* P81S |
| Pleural mesothelioma | *TSC2* Q432*  *PTCH1* P25fs*54  *BAP1* N349fs*13  *BAP1* splice site 784-1G>T  *CDKN2A/B* loss |
| Peritoneal mesothelioma | *BRCA2* K1872*  *NF2* M484fs*1 |
| Peritoneal mesothelioma | *CDKN2A/B* loss  *NF2* Q320*  *KRAS* G13C |
| Peritoneal mesothelioma | *MCL1* amplification  *CDH1* T379M  *ALK-STRN* fusion |
| Peritoneal mesothelioma | *DNMT3A* Y735C |
| Peritoneal mesothelioma | *CBL* R420Q  *BAP1* Q40* |
| Peritoneal mesothelioma | *BAP1* splice site 1730-2A>G |
| Peritoneal mesothelioma | *TSC2* loss |
| Peritoneal mesothelioma | *BCL2* H20Q |
| Peritoneal mesothelioma | *IGF1R* amplification  *NF2* L14fs*34 |
| Peritoneal mesothelioma | *BAP1* loss  *KMT2A* L3614P |
| Peritoneal mesothelioma | *RICTOR* amplification  *CDKN2A* L16fs*23  *TP53* N268I  *NF2* Q147fs*27 |
| Pericardial mesothelioma | *BAP1* S113fs*3  *BAP1* M80fs*45  *BAP1* Y44*  *MCL1* amplification |
| Pericardial mesothelioma | *BAP1* loss  *CTNNB1* splice site 1955-2_1955-1ins16 |
| Subtype unknown | *NF2* loss  *BAP1* deletion of int1-ex2 splice site |
| Subtype unknown | *ATM* splice site 2921+1G>C  *NF2* Q165* |
| Subtype unknown | *TP53* R175H  *NF2* R262*  *FBXW7* R658* |
| Subtype unknown | *CDKN2A/B* loss  *NF2* Q115fs*14  *NF2* E527* |
| Subtype unknown | *EPHA3* amplification  *SOX2* amplification |
| Subtype unknown | *SUFU* T13fs*83  *FGFR3* amplification  *TP53* R248Q  *CDKN2A/B* loss |

**Supplemental Table 3.** Association between *BAP1* aberrations, subtypes of mesothelioma and co-existing molecular alterations (N=42)

|  | Aberrant *BAP1*  N=20 (%) | Wild-type *BAP1*  N=22 (%) | Odds ratio  (95% CI) | *p*-value Univariate * |
| --- | --- | --- | --- | --- |
| Histology § |  |  |  |  |
| Pleural |  |  | 3.4 (0.94 to 12.0) | 0.059 |
| Yes (N=23) | 14 (60.9) | 9 (39.1) |  |  |
| No (N=19) | 6 (31.6) | 13 (68.4) |  |  |
| Peritoneal |  |  | 0.31 (0.07 to 1.40) | 0.12 |
| Yes (N=11) | 3 (27.3) | 8 (72.7) |  |  |
| No (N=31) | 17 (54.8) | 14 (45.2) |  |  |
| Co-existing aberrations § |  |  |  |  |
| *NF2* |  |  | 0.33 (0.09 to 1.20) | 0.12 |
| Aberrant (N=16) | 5 (31.3) | 11 (68.7) |  |  |
| Wild-type (N=26) | 15 (57.7) | 11 (42.3) |  |  |
| *CDKN2A/B* |  |  | 0.94 (0.27 to 3.34) | 1.0 |
| Loss (N=15) | 7 (46.7) | 8 (53.3) |  |  |
| Wild-type (N=27) | 13 (48.1) | 14 (51.9) |  |  |
| *TP53* |  |  | 0.14 (0.02 to 1.30) | 0.096 |
| Aberrant (N=7) | 1 (14.3) | 6 (85.7) |  |  |
| Wild-type (N=35) | 19 (54.3) | 16 (45.7) |  |  |

* *p*-values are from Fisher's exact test.

§ Included characteristics with N≥7.

**Supplemental Table 4.** Association between *NF2* aberration, subtypes of mesothelioma and co-existing molecular alterations (N=42)

|  | Aberrant *NF2*  N=16 (%) | Wild-type *NF2*  N=26 (%) | Odds ratio  (95% CI) | *p*-value Univariate * |
| --- | --- | --- | --- | --- |
| Histology § |  |  |  |  |
| Pleural |  |  | 0.73 (0.21 to 2.6) | 0.63 |
| Yes (N=23) | 8 (34.8) | 15 (65.2) |  |  |
| No (N=19) | 8 (42.1) | 11 (57.9) |  |  |
| Peritoneal |  |  | 0.90 (0.22 to 3.8) | 0.89 |
| Yes (N=11) | 4 (36.4) | 7 (63.6) |  |  |
| No (N=31) | 12 (38.7) | 19 (61.3) |  |  |
| Co-existing aberrations § |  |  |  |  |
| *BAP1* |  |  | 0.33 (0.09 to 1.20) | 0.12 |
| Aberrant (N=20) | 5 (25.0) | 15 (75.0) |  |  |
| Wild-type (N=22) | 11 (50.0) | 11 (50.0) |  |  |
| *CDKN2A/B* |  |  | 1.1 (0.31 to 4.1) | 1 |
| Loss (N=15) | 6 (40.0) | 9 (60.0) |  |  |
| Wild-type (N=27) | 10 (37.0) | 17 (63.0) |  |  |
| *TP53* |  |  | 1.3 (0.24 to 6.6) | 1 |
| Aberrant (N=7) | 3 (42.9) | 4 (57.1) |  |  |
| Wild-type (N=35) | 13 (37.1) | 22 (62.9) |  |  |

* *p*-values are from Fisher's exact test.

§ Included characteristics with N≥7.

**Supplemental Table 5.** Association between *CDKN2A/B* loss, subtypes of mesothelioma and co-existing molecular alterations (N=42)

|  | Loss of *CDKN2A/B*  N=15 (%) | Wild-type *CDKN2A/B*  N=27 (%) | Odds ratio  (95% CI) | *p*-value Univariate * |
| --- | --- | --- | --- | --- |
| Histology § |  |  |  |  |
| Pleural |  |  | 5.8 (1.3 to 26) | **0.01** |
| Yes (N=23) | 12 (52.2) | 11 (47.8) |  |  |
| No (N=19) | 3 (15.8) | 16 (84.2) |  |  |
| Peritoneal |  |  | 0.12 (0.014 to 1.1) | **0.032** |
| Yes (N=11) | 1 (9.1) | 10 (90.9) |  |  |
| No (N=31) | 14 (45.2) | 17 (54.8) |  |  |
| Co-existing aberrations § |  |  |  |  |
| *BAP1* |  |  | 0.94 (0.27 to 3.3) | 1 |
| Aberrant (N=20) | 7 (35.0) | 13 (65.0) |  |  |
| Wild-type (N=22) | 8 (36.4) | 14 (63.6) |  |  |
| *NF2* |  |  | 1.1 (0.31 to 4.1) | 1 |
| Aberrant (N=16) | 6 (37.5) | 10 (62.5) |  |  |
| Wild-type (N=26) | 9 (34.6) | 17 (65.4) |  |  |
| *TP53* |  |  | 0.68 (0.11 to 4.0) | 1 |
| Aberrant (N=7) | 2 (28.6) | 5 (71.4) |  |  |
| Wild-type (N=35) | 13 (37.1) | 22 (62.9) |  |  |

* *p*-values are from Fisher's exact test.

§ Included characteristics with N≥7.

**Supplemental Table 6: Explanations for the examples of theoretical therapies on Table 1.**

| Gene aberration | Comment for examples of theoretical therapies |
| --- | --- |
| *ABL1* mutation | *ABL1* aberration is potentially targetable with imatinib, nilotinib or dasatinib (S1). |
| *AKT2* amplification | AKT is targetable with mTOR inhibitors such as everolimus (S2, 3). |
| *ALK* fusion | Ligand-independent activation of ALK is associated with dependency of the cancer on continued signaling from the oncogenic kinase for cell growth and survival (S4). *ALK* fusion is targetable with crizotinib (S4, 5). |
| *ARID1A* mutation | Inhibition of EZH2 methyltransferase was shown to act in a synthetic lethal manner in *ARID1A*-mutated cancer in preclinical model (S64). Clinical trial with EZH2 inhibitor (EPZ-6438) is ongoing (NCT01897571). |
| *ARID2* mutation | To our knowledge, there is no targeted therapy for *ARID2* aberration. |
| *ATM* mutation | Aberration in *ATM* leads to defects in DNA double strand break repair. PARP inhibitor selectively inhibited *ATM* mutant leukemia cell lines in vivo and in vitro by synthetic lethality (S8). Thus *ATM* mutation is potentially targetable with PARP inhibitor such as olaparib. |
| *BAP1* aberration | BAP1 binds to the BRCA1 and regulates key cellular pathway including DNA damage response (S9).  Renal cancer cell line with BAP1 loss was sensitive to PARP inhibitors (S10). However in mesothelioma cell lines, no difference was observed between BAP-1 mutant and wild-type cells in sensitivity to PARP inhibitors (S65) and requires further investigation.  Since BAP1 is BRCA1 associated protein-1, platinum such as cisplatin or carboplatin can be considered (S11, 12).  Vorinostat (histone deacetylase [HDAC] inhibitor): Phase III randomized study failed to demonstrate improve overall survival in patients with malignant pleural mesothelioma (S66). However, this trial did not stratify patients based on *BAP1* aberration status and thus further subset analysis is required.  In a preclinical study, mesothelioma cells that lack BAP1 were sensitive to EZH2 pharmacologic inhibition. EPZ011989 is an EZH2 inhibitor (S13). |
| *BCL2* mutation | *BCL2* mutation was associated with increased risk of transformation and shortened survival in follicular lymphoma patients. BCL2 is potentially targetable with Bcl-2 inhibitors (S67). |
| *BRCA2* mutation | *BRCA1/2* mutations are sensitive to inhibition of PARP enzymatic activity, resulting in chromosomal instability and apoptosis (S16).  Patients with *BRCA1/2* mutations are more sensitive to platinum such as cisplatin or carboplatin (S11, 12). |
| *CBL* mutation | CBL is involved in cell signaling and protein ubiquitination. To our knowledge, there is no targeted therapy for *CBL* aberration. |
| *CCNE1* amplification | *CCNE1* amplification promotes unscheduled S-Phase entry, disrupted DNA replication, and genomic instability (S18). Since Cyclin E1 forms a complex with CDK2, it is potentially targetable with CDK inhibitor such as dinaciclib (CDK1/2/5/9 inhibitor) (S19).  shRNA synthetic lethal screen showed members of the ubiquitin pathway were selectively required in cancers that harbor *CCNE1* amplification. Subsequently, it was shown there was specific sensitivity of *CCNE1* amplified tumor cells to the proteasome inhibitor, bortezomib (S20). |
| *CDH1* mutation | *CDH1* aberration has been associated with cancer disorders such as hereditary diffuse gastric cancer and poor clinical outcome in patients with cancer(S21). However, to our knowledge, there is no targeted therapy for *CDH1* aberration. |
| *CDKN2A/B* loss and mutation | *CDKN2A/B* loss leads to activation of cyclin D-CDK 4/6 complex. Thus it is potentially targetable with CDK4/6 inhibitor such as palbociclib (S22, 68). However, some publications suggest that patients with these alterations may not respond (S69). |
| *CTNNB1* mutation | Beta-catenin antagonist is currently in early phase clinical trials (CT02413853, NCT01764477). |
| *DNMT3A* mutation | *DNMT3A* mutations predicted response to decitabine in patients with acute myeloid leukemia (S70). |
| *EMSY* amplification | Since EMSY is capable of silencing the activity of BRCA2, its amplification is potentially targetable with PARP inhibitor or platinum (S71, 72). |
| *EPHA3* amplification | Clinical trial with anti-EphA3 antibody is currently in early phase clinical trial (NCT 01211691). |
| *FBXW7* mutation | *FBXW7* is key regulator of the cell cycle and involved in cell division, growth and differentiation (S29).  mTOR is target for ubiquitination and degradation by binding to Fbxw7. Thus *Fbxw7* mutation may lead to increase level of mTOR protein which may be targeted with mTOR inhibitors (S30). |
| *FGFR3* amplification | FGFR3 is involved in cell survival, migration, angiogenesis and carcinogenesis (S31).  FGFR3 is targetable with tyrosine kinase inhibitors such as dovitinib and ponatinib (S4). |
| *IGF-1R* amplification | *IGF-1R* amplification is targetable with IGF-1R inhibitor (S32, 33). |
| *KDR* mutation | *KDR* aberration is potentially targetable with VEGFR-2 inhibitor such as cabozantinib (S34). |
| *KMT2A* mutation | KMT2 family protenin is involved in modulating chromatin structures, DNA accessibility and tumorigenesis (S35).  Potentially targetable with small molecules that targets KMT2A associated proteins that includes DOT1L and CDK9 (DOT1L targeted with EPZ-5676, CDK9 targeted with flavopiridol) (S35). |
| *MAP2K1* mutation | MAP2K1 is involved in cell proliferation, differentiation and development.  *MAP2K1* aberration is targetable with MEK inhibitor trametinib (S50). |
| *MCL1* amplification | MCL1 maintains cell survival and also associated with therapeutic resistance (S36).  In preclinical model, sorafenib downregulated phospho-STAT3 and subsequently reduced the expression of MCL-1 leading to decrease cell viability (S37). |
| *MDM2* amplification | *MDM2* amplification leads to inactivation of p53 (S38).  *MDM2* amplification is targetable with MDM2 inhibitors that are currently in early phase clinical trials (DS-3032b: NCT01877382, RO6839921: NCT02098967). |
| *MYC* amplification | MYC affects cell cycle entry, proliferation, differentiation and metabolism (S39).  To date, although there is no successful therapy targeting MYC, rapid progress is being made by utilizing genomics to identify MYC-dependent synthetic genetic interaction to identify druggable targets (S39).  Aurora kinase has been shown to demonstrate synthetic lethal interaction with MYC. Aurora kinase is targetable with aurora kinase inhibitor (e.g. MLN8237) (S40).  In preclinical model, MYC overexpressed cells were sensitive to CDK1 inhibitor. Thus *MYC* amplification is potentially actionable with dinaciclib (CDK1/2/5/9 inhibitor) (S41). |
| *NF1* mutation | *NF1* encodes protein neurofibromin(S42) that function as a RAS-GTPase activating protein (GAP) which is a negative regulator of RAS proto-oncogene. Thus aberration of *NF1* leads to increased activation of downstream signaling, especially mTOR pathway (S42).  *NF1* aberration is targetable with mTOR inhibitors such as everolimus or temsirolimus (S42, 43).  *NF1* aberration is associated with RAS activation and leads to MEK dependency. Thus it is targetable with MEK inhibitor such as trametinib (S44). |
| *NF2* aberration | Since NF2 is negative regulator of mTOR, it is potentially targetable with mTOR inhibitor. Of interest, one patient with metaplastic breast cancer with *NF2* aberration achieved complete response (3+ years) with temsirolimus containing regimen (S73). It is also reported one patient with neurofibromatosis type 2 with brain tumor had partial response with temsirolimus containing regimen (S74).  In preclinical model, lack of NF2/merlin was associated with increase sensitivity to FAK inhibitor. There are ongoing trial with FAK inhibitors, VS-6063 (defactinib) (NCT02004028) and GSK2256098 (NCT01938443) in patients with mesothelioma. |
| *PIK3R2* mutation | *PIK3R2* aberration is targetable with mTOR inhibitors such as with everolimus (S47). |
| *PTCH1* mutation | PTCH1 is receptor for Hedgehog signaling pathway that regulates cell growth and differentiation. Mutation of *PTCH1* can lead to decreased inhibition of smoothened (SMO) which results in activation of *GLI* transcription factors and consequent induction of target genes.  *PTCH1* mutation is targetable with SMO inhibitor vismodegib (S48). |
| *RAS* mutations | *RAS* mutations leads to constitutive activation of RAS which results in persistent stimulation of it multitude of downstream signaling pathways. This results in increased proliferation, suppression of apoptosis, altered metabolism and metastasis (S49).  Although targeting *RAS* mutation has been challenging (S49), it is potentially targetable with MEK inhibitor, trametinib (S50). |
| *RICTOR* amplification | Since selective mTORC1 (mTOR/RAPTOR) inhibition such as with everolimus will lead to increase AKT phosphorylation through mTORC2 complex activation, dual inhibition of both mTORC1/2 is necessary to target RICTOR amplification (S75). |
| *SOX2* amplification | *SOX-2* is associated with tumor initiation and progression (S52).  *SOX2* is a transcription factor and to our knowledge, there is no targeted therapy for *SOX2* aberration. |
| *STK11* mutation | *STK11* aberration contributes to mTORC1 activation and thus it is targetable with mTORC1 inhibitor such as everolimus or temsirolimus (S53, 55).  STK11 also functions as inhibitor of focal adhesion kinase (FAK). Thus its aberration can lead to increase in FAK signaling (S54). FAK signaling is targetable with dasatinib (S56) or bosutinib (S57). |
| *SUFU* mutation | *SUFU* aberration can lead to activation of Hedgehog pathway and associated with Gorlin syndrome (nevoid basal cell carcinoma syndrome) (S58). *SUFU* aberration has been associated with vismodegib (smoothened receptor antagonist) resistance (S58). However, targeting the downstream of SUFU with arsenic trioxide or bromo and extra C-terminal (BET) inhibitors that regulates glial transcriptional activity can be considered. |
| *TP53* mutation | TP53 is involved in wide range of functions including regulation of gene expression, genetic stability and cell cycle (S59).  Retrospective data suggest patients with *TP53* mutation had longer progression-free survival with bevacizumab containing regimen when compared to non-bevacizumab containing regimen (medialn 11.0 vs. 4.0 months (p<0.0001) (S60). Interestingly, multiple regression analysis of transcriptomic data revealed *TP53* mutations are associated with higher *VEGF-A* expression (p = 0.0006) suggesting the *TP53* as a marker to predict bevacizumab response (S76). |
| *TSC2* aberration | Since TSC2 is negative regulator of mTOR, it is targetable with mTOR inhibitor such as everolimus or temsirolimus (S61). |
| *VHL* mutation | In setting of non-functional VHL, HIF accumulates leading to increase vascular endothelial growth factor (VEGF) or platelet derived growth factor (PDGF) (S62).  *VHL* mutation is targetable with VEGF or PDGF receptor inhibitors (S63). |

**SUPPLEMENTAL FIGURE LEGEND**

**Supplemental Figure 1**.

(A) Number of genetic aberrations per patient (N=42). Median number of molecular aberrations per patient was 3 (range, 1 to 5)

(B) Number of actionable genetic aberrations per patient either with FDA approved therapies or with therapies that are in clinical trial. Median number of potentially actionable aberrations per patient was 3 (range, 1 to 5) (**Supplemental Table 1**) (N=42).

**Supplemental Figure 1**. Number of genetic aberrations per patient (**A**) and number of potentially actionable genetic aberrations per patient (**B**) (N=42)

**A**.

**B**.

**SUPPLEMENTAL REFERENCES**

S1. Greuber EK, Smith-Pearson P, Wang J, Pendergast AM. Role of ABL family kinases in cancer: from leukaemia to solid tumours. Nat Rev Cancer 2013;13:559-71.

S2. Janku F, Hong DS, Fu S, Piha-Paul SA, Naing A, Falchook GS, et al. Assessing PIK3CA and PTEN in early-phase trials with PI3K/AKT/mTOR inhibitors. Cell Rep 2014;6:377-87.

S3. Janku F, Wheler JJ, Westin SN, Moulder SL, Naing A, Tsimberidou AM, et al. PI3K/AKT/mTOR inhibitors in patients with breast and gynecologic malignancies harboring PIK3CA mutations. J Clin Oncol 2012;30:777-82.

S4. Shaw AT, Hsu PP, Awad MM, Engelman JA. Tyrosine kinase gene rearrangements in epithelial malignancies. Nat Rev Cancer 2013;13:772-87.

S5. Camidge DR, Bang YJ, Kwak EL, Iafrate AJ, Varella-Garcia M, Fox SB, et al. Activity and safety of crizotinib in patients with ALK-positive non-small-cell lung cancer: updated results from a phase 1 study. Lancet Oncol 2012;13:1011-9.

S6. Wilson BG, Roberts CW. SWI/SNF nucleosome remodellers and cancer. Nat Rev Cancer 2011;11:481-92.

S7. Li M, Zhao H, Zhang X, Wood LD, Anders RA, Choti MA, et al. Inactivating mutations of the chromatin remodeling gene ARID2 in hepatocellular carcinoma. Nat Genet 2011;43:828-9.

S8. Weston VJ, Oldreive CE, Skowronska A, Oscier DG, Pratt G, Dyer MJ, et al. The PARP inhibitor olaparib induces significant killing of ATM-deficient lymphoid tumor cells in vitro and in vivo. Blood 2010;116:4578-87.

S9. Carbone M, Yang H, Pass HI, Krausz T, Testa JR, Gaudino G. BAP1 and cancer. Nat Rev Cancer 2013;13:153-9.

S10. Pena-Llopis S, Vega-Rubin-de-Celis S, Liao A, Leng N, Pavia-Jimenez A, Wang S, et al. BAP1 loss defines a new class of renal cell carcinoma. Nat Genet 2012;44:751-9.

S11. Isakoff SJ, Mayer EL, He L, Traina TA, Carey LA, Krag KJ, et al. TBCRC009: A Multicenter Phase II Clinical Trial of Platinum Monotherapy With Biomarker Assessment in Metastatic Triple-Negative Breast Cancer. J Clin Oncol 2015;33:1902-9.

S12. Silver DP, Richardson AL, Eklund AC, Wang ZC, Szallasi Z, Li Q, et al. Efficacy of neoadjuvant Cisplatin in triple-negative breast cancer. J Clin Oncol 2010;28:1145-53.

S13. LaFave LM, Beguelin W, Koche R, Teater M, Spitzer B, Chramiec A, et al. Loss of BAP1 function leads to EZH2-dependent transformation. Nat Med 2015;21:1344-9.

S14. Gandhi L, Camidge DR, Ribeiro de Oliveira M, Bonomi P, Gandara D, Khaira D, et al. Phase I study of Navitoclax (ABT-263), a novel Bcl-2 family inhibitor, in patients with small-cell lung cancer and other solid tumors. J Clin Oncol 2011;29:909-16.

S15. Souers AJ, Leverson JD, Boghaert ER, Ackler SL, Catron ND, Chen J, et al. ABT-199, a potent and selective BCL-2 inhibitor, achieves antitumor activity while sparing platelets. Nat Med 2013;19:202-8.

S16. Farmer H, McCabe N, Lord CJ, Tutt AN, Johnson DA, Richardson TB, et al. Targeting the DNA repair defect in BRCA mutant cells as a therapeutic strategy. Nature 2005;434:917-21.

S17. Tutt A, Robson M, Garber JE, Domchek SM, Audeh MW, Weitzel JN, et al. Oral poly(ADP-ribose) polymerase inhibitor olaparib in patients with BRCA1 or BRCA2 mutations and advanced breast cancer: a proof-of-concept trial. Lancet 2010;376:235-44.

S18. Caldon CE, Musgrove EA. Distinct and redundant functions of cyclin E1 and cyclin E2 in development and cancer. Cell Div 2010;5:2.

S19. Parry D, Guzi T, Shanahan F, Davis N, Prabhavalkar D, Wiswell D, et al. Dinaciclib (SCH 727965), a novel and potent cyclin-dependent kinase inhibitor. Mol Cancer Ther 2010;9:2344-53.

S20. Etemadmoghadam D, Weir BA, Au-Yeung G, Alsop K, Mitchell G, George J, et al. Synthetic lethality between CCNE1 amplification and loss of BRCA1. Proc Natl Acad Sci U S A 2013;110:19489-94.

S21. Graziano F, Humar B, Guilford P. The role of the E-cadherin gene (CDH1) in diffuse gastric cancer susceptibility: from the laboratory to clinical practice. Ann Oncol 2003;14:1705-13.

S22. Rocca A, Farolfi A, Bravaccini S, Schirone A, Amadori D. Palbociclib (PD 0332991) : targeting the cell cycle machinery in breast cancer. Expert Opin Pharmacother 2014;15:407-20.

S23. Polakis P. Wnt signaling in cancer. Cold Spring Harb Perspect Biol 2012;4.

S24. Polakis P. Drugging Wnt signalling in cancer. EMBO J 2012;31:2737-46.

S25. Yang L, Rau R, Goodell MA. DNMT3A in haematological malignancies. Nat Rev Cancer 2015;15:152-65.

S26. Im AP, Sehgal AR, Carroll MP, Smith BD, Tefferi A, Johnson DE, et al. DNMT3A and IDH mutations in acute myeloid leukemia and other myeloid malignancies: associations with prognosis and potential treatment strategies. Leukemia 2014;28:1774-83.

S27. Hughes-Davies L, Huntsman D, Ruas M, Fuks F, Bye J, Chin SF, et al. EMSY links the BRCA2 pathway to sporadic breast and ovarian cancer. Cell 2003;115:523-35.

S28. Day BW, Stringer BW, Al-Ejeh F, Ting MJ, Wilson J, Ensbey KS, et al. EphA3 maintains tumorigenicity and is a therapeutic target in glioblastoma multiforme. Cancer Cell 2013;23:238-48.

S29. Takeishi S, Nakayama KI. Role of Fbxw7 in the maintenance of normal stem cells and cancer-initiating cells. Br J Cancer 2014;111:1054-9.

S30. Mao JH, Kim IJ, Wu D, Climent J, Kang HC, DelRosario R, et al. FBXW7 targets mTOR for degradation and cooperates with PTEN in tumor suppression. Science 2008;321:1499-502.

S31. Helsten T, Elkin S, Arthur E, Tomson BN, Carter J, Kurzrock R. The Fgfr Landscape in Cancer: Analysis of 4853 Tumors by Next Generation Sequencing. Clin Cancer Res 2015.

S32. Arcaro A. Targeting the insulin-like growth factor-1 receptor in human cancer. Front Pharmacol 2013;4:30.

S33. Kurzrock R, Patnaik A, Aisner J, Warren T, Leong S, Benjamin R, et al. A phase I study of weekly R1507, a human monoclonal antibody insulin-like growth factor-I receptor antagonist, in patients with advanced solid tumors. Clin Cancer Res 2010;16:2458-65.

S34. Yakes FM, Chen J, Tan J, Yamaguchi K, Shi Y, Yu P, et al. Cabozantinib (XL184), a novel MET and VEGFR2 inhibitor, simultaneously suppresses metastasis, angiogenesis, and tumor growth. Mol Cancer Ther 2011;10:2298-308.

S35. Rao RC, Dou Y. Hijacked in cancer: the KMT2 (MLL) family of methyltransferases. Nat Rev Cancer 2015;15:334-46.

S36. Leverson JD, Zhang H, Chen J, Tahir SK, Phillips DC, Xue J, et al. Potent and selective small-molecule MCL-1 inhibitors demonstrate on-target cancer cell killing activity as single agents and in combination with ABT-263 (navitoclax). Cell Death Dis 2015;6:e1590.

S37. Tai WT, Shiau CW, Chen HL, Liu CY, Lin CS, Cheng AL, et al. Mcl-1-dependent activation of Beclin 1 mediates autophagic cell death induced by sorafenib and SC-59 in hepatocellular carcinoma cells. Cell Death Dis 2013;4:e485.

S38. Khoo KH, Verma CS, Lane DP. Drugging the p53 pathway: understanding the route to clinical efficacy. Nat Rev Drug Discov 2014;13:217-36.

S39. Horiuchi D, Anderton B, Goga A. Taking on challenging targets: making MYC druggable. Am Soc Clin Oncol Educ Book 2014:e497-502.

S40. Yang D, Liu H, Goga A, Kim S, Yuneva M, Bishop JM. Therapeutic potential of a synthetic lethal interaction between the MYC proto-oncogene and inhibition of aurora-B kinase. Proc Natl Acad Sci U S A 2010;107:13836-41.

S41. Goga A, Yang D, Tward AD, Morgan DO, Bishop JM. Inhibition of CDK1 as a potential therapy for tumors over-expressing MYC. Nat Med 2007;13:820-7.

S42. Lodish MB, Stratakis CA. Endocrine tumours in neurofibromatosis type 1, tuberous sclerosis and related syndromes. Best Pract Res Clin Endocrinol Metab 2010;24:439-49.

S43. Iyer G, Hanrahan AJ, Milowsky MI, Al-Ahmadie H, Scott SN, Janakiraman M, et al. Genome sequencing identifies a basis for everolimus sensitivity. Science 2012;338:221.

S44. Nissan MH, Pratilas CA, Jones AM, Ramirez R, Won H, Liu C, et al. Loss of NF1 in cutaneous melanoma is associated with RAS activation and MEK dependence. Cancer Res 2014;74:2340-50.

S45. Schroeder RD, Angelo LS, Kurzrock R. NF2/merlin in hereditary neurofibromatosis 2 versus cancer: biologic mechanisms and clinical associations. Oncotarget 2014;5:67-77.

S46. Shapiro IM, Kolev VN, Vidal CM, Kadariya Y, Ring JE, Wright Q, et al. Merlin deficiency predicts FAK inhibitor sensitivity: a synthetic lethal relationship. Sci Transl Med 2014;6:237ra68.

S47. Cheung LW, Hennessy BT, Li J, Yu S, Myers AP, Djordjevic B, et al. High frequency of PIK3R1 and PIK3R2 mutations in endometrial cancer elucidates a novel mechanism for regulation of PTEN protein stability. Cancer Discov 2011;1:170-85.

S48. LoRusso PM, Rudin CM, Reddy JC, Tibes R, Weiss GJ, Borad MJ, et al. Phase I trial of hedgehog pathway inhibitor vismodegib (GDC-0449) in patients with refractory, locally advanced or metastatic solid tumors. Clin Cancer Res 2011;17:2502-11.

S49. Bryant KL, Mancias JD, Kimmelman AC, Der CJ. KRAS: feeding pancreatic cancer proliferation. Trends Biochem Sci 2014;39:91-100.

S50. Infante JR, Fecher LA, Falchook GS, Nallapareddy S, Gordon MS, Becerra C, et al. Safety, pharmacokinetic, pharmacodynamic, and efficacy data for the oral MEK inhibitor trametinib: a phase 1 dose-escalation trial. Lancet Oncol 2012;13:773-81.

S51. Sarbassov DD, Guertin DA, Ali SM, Sabatini DM. Phosphorylation and regulation of Akt/PKB by the rictor-mTOR complex. Science 2005;307:1098-101.

S52. Boumahdi S, Driessens G, Lapouge G, Rorive S, Nassar D, Le Mercier M, et al. SOX2 controls tumour initiation and cancer stem-cell functions in squamous-cell carcinoma. Nature 2014;511:246-50.

S53. Dancey J. mTOR signaling and drug development in cancer. Nat Rev Clin Oncol 2010;7:209-19.

S54. Kline ER, Shupe J, Gilbert-Ross M, Zhou W, Marcus AI. LKB1 represses focal adhesion kinase (FAK) signaling via a FAK-LKB1 complex to regulate FAK site maturation and directional persistence. J Biol Chem 2013;288:17663-74.

S55. Klumpen HJ, Queiroz KC, Spek CA, van Noesel CJ, Brink HC, de Leng WW, et al. mTOR inhibitor treatment of pancreatic cancer in a patient With Peutz-Jeghers syndrome. J Clin Oncol 2011;29:e150-3.

S56. Nam S, Kim D, Cheng JQ, Zhang S, Lee JH, Buettner R, et al. Action of the Src family kinase inhibitor, dasatinib (BMS-354825), on human prostate cancer cells. Cancer Res 2005;65:9185-9.

S57. Vultur A, Buettner R, Kowolik C, Liang W, Smith D, Boschelli F, et al. SKI-606 (bosutinib), a novel Src kinase inhibitor, suppresses migration and invasion of human breast cancer cells. Mol Cancer Ther 2008;7:1185-94.

S58. Sharpe HJ, Pau G, Dijkgraaf GJ, Basset-Seguin N, Modrusan Z, Januario T, et al. Genomic analysis of smoothened inhibitor resistance in basal cell carcinoma. Cancer Cell 2015;27:327-41.

S59. van Oijen MG, Slootweg PJ. Gain-of-function mutations in the tumor suppressor gene p53. Clin Cancer Res 2000;6:2138-45.

S60. Said R, Hong DS, Warneke CL, Lee JJ, Wheler JJ, Janku F, et al. P53 mutations in advanced cancers: clinical characteristics, outcomes, and correlation between progression-free survival and bevacizumab-containing therapy. Oncotarget 2013;4:705-14.

S61. Wagle N, Grabiner BC, Van Allen EM, Amin-Mansour A, Taylor-Weiner A, Rosenberg M, et al. Response and acquired resistance to everolimus in anaplastic thyroid cancer. N Engl J Med 2014;371:1426-33.

S62. Cowey CL, Rathmell WK. VHL gene mutations in renal cell carcinoma: role as a biomarker of disease outcome and drug efficacy. Curr Oncol Rep 2009;11:94-101.

S63. Jonasch E, McCutcheon IE, Waguespack SG, Wen S, Davis DW, Smith LA, et al. Pilot trial of sunitinib therapy in patients with von Hippel-Lindau disease. Ann Oncol 2011;22:2661-6.

S64. Bitler BG, Aird KM, Garipov A, Li H, Amatangelo M, Kossenkov AV, et al. Synthetic lethality by targeting EZH2 methyltransferase activity in ARID1A-mutated cancers. Nat Med 2015;21:231-8.

S65. Bott M, Brevet M, Taylor BS, Shimizu S, Ito T, Wang L, et al. The nuclear deubiquitinase BAP1 is commonly inactivated by somatic mutations and 3p21.1 losses in malignant pleural mesothelioma. Nat Genet 2011;43:668-72.

S66. Krug LM, Kindler HL, Calvert H, Manegold C, Tsao AS, Fennell D, et al. Vorinostat in patients with advanced malignant pleural mesothelioma who have progressed on previous chemotherapy (VANTAGE-014): a phase 3, double-blind, randomised, placebo-controlled trial. Lancet Oncol 2015;16:447-56.

S67. Correia C, Schneider PA, Dai H, Dogan A, Maurer MJ, Church AK, et al. BCL2 mutations are associated with increased risk of transformation and shortened survival in follicular lymphoma. Blood 2015;125:658-67.

S68. Kato S, Schwaederle M, Daniels GA, Piccioni D, Kesari S, Bazhenova L, et al. Cyclin-dependent kinase pathway aberrations in diverse malignancies: clinical and molecular characteristics. Cell Cycle 2015;14:1252-9.

S69. DeMichele A, Clark AS, Tan KS, Heitjan DF, Gramlich K, Gallagher M, et al. CDK 4/6 inhibitor palbociclib (PD0332991) in Rb+ advanced breast cancer: phase II activity, safety, and predictive biomarker assessment. Clin Cancer Res 2015;21:995-1001.

S70. Metzeler KH, Walker A, Geyer S, Garzon R, Klisovic RB, Bloomfield CD, et al. DNMT3A mutations and response to the hypomethylating agent decitabine in acute myeloid leukemia. Leukemia 2012;26:1106-7.

S71. Michels J, Vitale I, Saparbaev M, Castedo M, Kroemer G. Predictive biomarkers for cancer therapy with PARP inhibitors. Oncogene 2014;33:3894-907.

S72. Dedes KJ, Wilkerson PM, Wetterskog D, Weigelt B, Ashworth A, Reis-Filho JS. Synthetic lethality of PARP inhibition in cancers lacking BRCA1 and BRCA2 mutations. Cell Cycle 2011;10:1192-9.

S73. Moulder S, Helgason T, Janku F, Wheler J, Moroney J, Booser D, et al. Inhibition of the phosphoinositide 3-kinase pathway for the treatment of patients with metastatic metaplastic breast cancer. Ann Oncol 2015;26:1346-52.

S74. Subbiah V, Slopis J, Hong DS, Ketonen LM, Hamilton J, McCutcheon IE, et al. Treatment of patients with advanced neurofibromatosis type 2 with novel molecularly targeted therapies: from bench to bedside. J Clin Oncol 2012;30:e64-8.

S75. Breuleux M, Klopfenstein M, Stephan C, Doughty CA, Barys L, Maira SM, et al. Increased AKT S473 phosphorylation after mTORC1 inhibition is rictor dependent and does not predict tumor cell response to PI3K/mTOR inhibition. Mol Cancer Ther 2009;8:742-53.

S76. Schwaederle M, Lazar V, Validire P, Hansson J, Lacroix L, Soria JC, et al. VEGF-A Expression Correlates with TP53 Mutations in Non-Small Cell Lung Cancer: Implications for Antiangiogenesis Therapy. Cancer Res 2015;75:1187-90.
